# Supplementary material for: Pyriproxyfen-treated bed nets reduce reproductive fitness and longevity of pyrethroid-resistant Anopheles gambiae under laboratory and field conditions
Source: PubMed Central journal article supplement (PMC8218427; doi:10.1186/s12936-021-03794-z), 2021-06-22

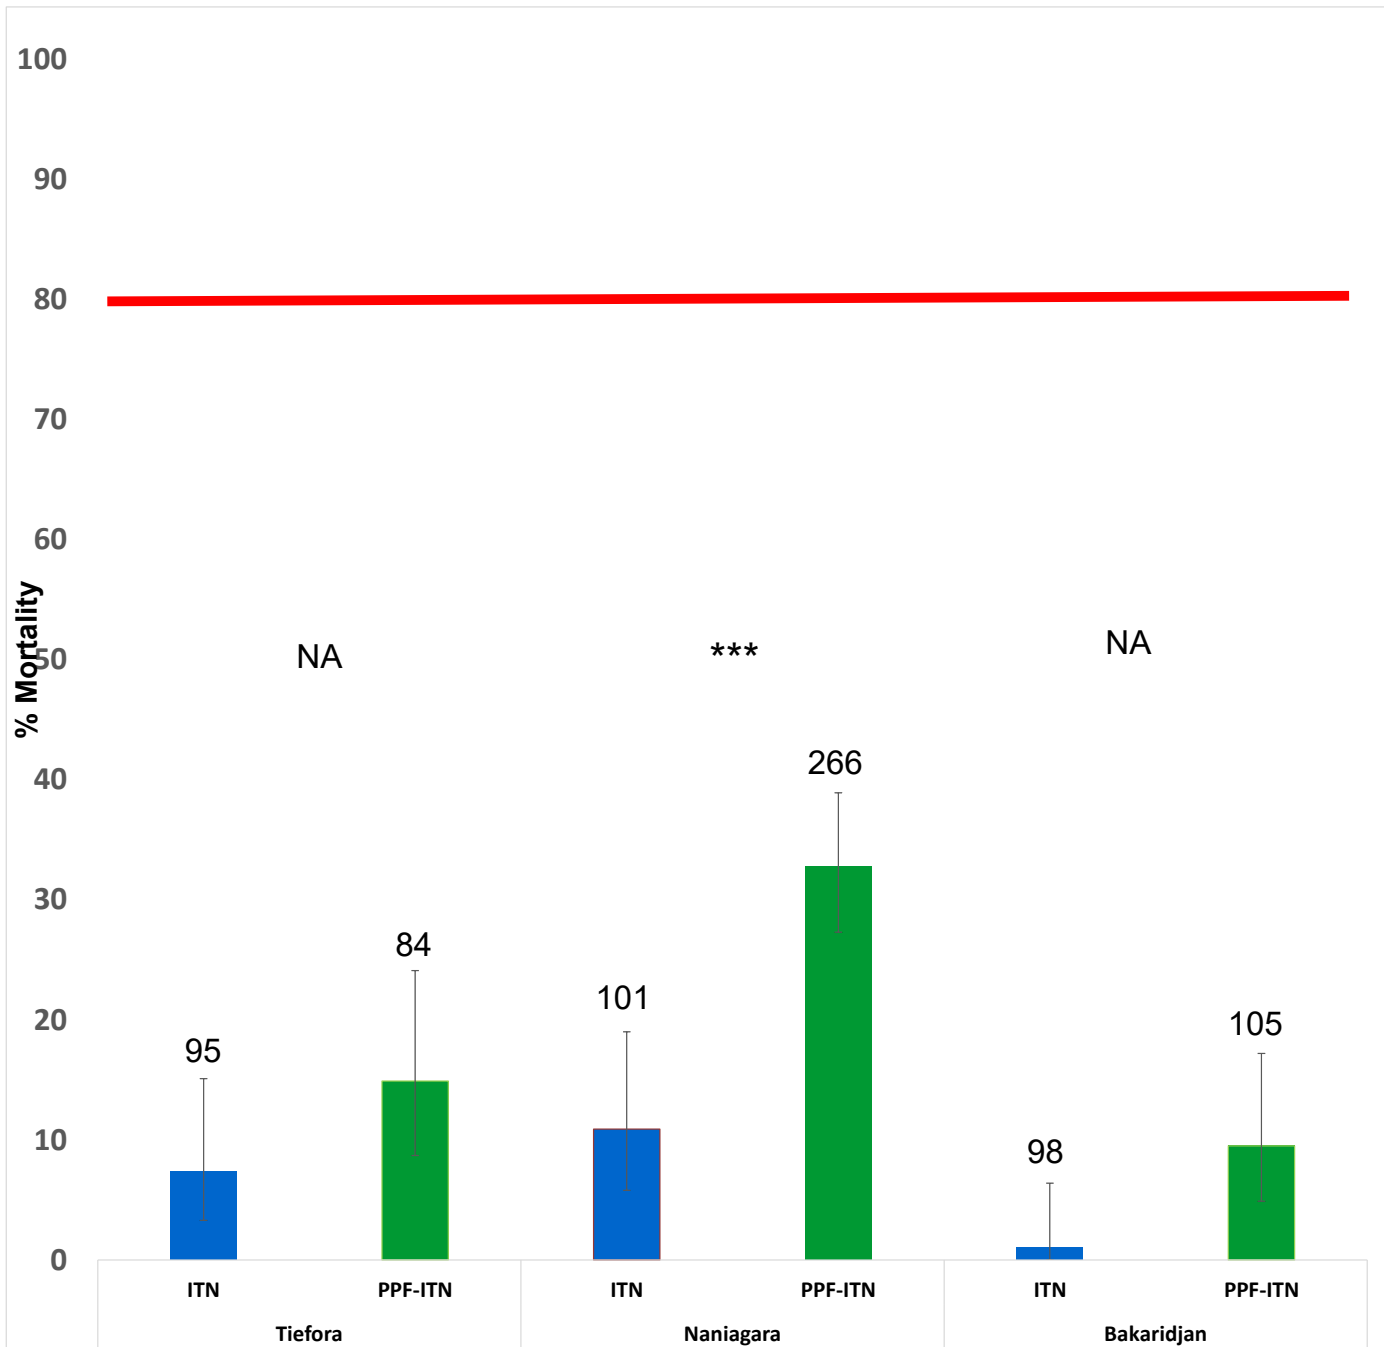

Supplement: 12936_2021_3794_MOESM3_ESM.pdf [file 12936_2021_3794_MOESM3_ESM.pdf]
